# Supplementary material for: Two Aquaporin Genes, GhPIP2;7 and GhTIP2;1, Positively Regulate the Tolerance of Upland Cotton to Salt and Osmotic Stresses
Source: Front Plant Sci. 2022 Feb 11;12:780486. doi: 10.3389/fpls.2021.780486 (PMC8873789; doi:10.3389/fpls.2021.780486)
Supplement: Supplementary Table S1 — Primer sequences of candidate genes used in qRT-PCR. [file Table_1.xls]

## Sheet: Primers
Table S1 Primer sequences of candidate genes used in qRT-PCR
Gene Name	Sequences (5' to 3')
GhUBQ7	GAAGGCATTCCACCTGACCAAC
	CTTGACCTTCTTCTTCTTGTGCTTG
GhPIP1;1	AGCACCATTGTTTGAGCCTGGT
	GCCACCTGAAATGCCAGCAGTA
GhPIP1;2	GCTCTCAAATCCGCTACGAGCA
	GAAGGTGGCTACAAACTCGGCA
GhPIP1;3	TGGGATTGCTGAGTTTGTGGCA
	TGCCTTGGATACCAACACTGGC
GhPIP1;4	CCAACTAAGGTCTCCCAGCAG
	ATGACCGACCAATCGTTTTTGG
GhPIP1;5	TTGGGAGCCAACAAGTTCCCAG
	ACCAAAAGCCCAAGCAATCCCT
GhPIP1;7	GTGTTCTCAGCCACTGATGCCA
	GAAAATGATGGCCGCACCAAGG
GhPIP1;8	GGCGAGGAAACTGTCGTTGACT
	TTTAACCACACCCGCACCACAT
GhPIP1;9	GGTTCGCAGTCTTCGTGGTACA
	CAGGGCTGCTCCAATCAAAGGT
GhPIP1;10	AAGCGTAATGCACGAGACTCCC
	ACGGGAATTGTTGCCAAGTGGA
GhPIP2;2	CGAGACTGCAGAGCAACATGGA
	CTCGGCAATCACTGCCCTGTAA
GhPIP2;3	GCGAAGGACTACCATGACCCAC
	CACCACCACAATCCGGGTCAAT
GhPIP2;4	TGTATTGGCTCCCCTCCCCATT
	CTTAGCAGCTCCTGCCCTCAAG
GhPIP2;5	AGACCCAGACCGACCTTGCTAA
	GGTCACTGCTGGGTTGATGTGT
GhPIP2;6	AATGGTGGGGTCTCAGACAAT
	TGTCAATACATAGCCTTGCCG
GhPIP2;6	GCCAAGAATATGTGGACGGC
	CCCACCATGGATGGACTGTT
GhPIP2;7	ATCCCTGTCTTGGCACCACTTC
	GATAACAGCGGCCCCAAAGCTA
GhPIP2;8	TCAACAAGGGCACCGGTTTAGG
	TGGTCATCCCAGGCCTTCTCTT
GhPIP2;9	GGCTCAGTGCTTGGGTGCTATT
	GTAGCTCATTGGCTCCACCACC
GhPIP2;10	ACACTGATTGTCAGACCGACTT
	TACGAACAGTGAGCTCTAAGCG															2
GhPIP2;12	CACCGGCACCTCTGATTGACAT
	CCGGCAGTGCAGTAAACAAGGA
GhPIP2;13	TGGTACAAACGTCGTGGTTGCT
	GTGTAGACGAGGACGAAGGTGC
GhPIP2;14	TTTCGAGCGGTAGCGTACATGG
	GAATCACGTGCGCTCCTTTTGG
GhTIP1;1	TCGTGATGACCTTCGGATTGG
	CAGTGGTTGTCCCATGTCCA
GhTIP2;1	TCAAGGAGTGGTGATGGAGAT
	ATATGCCGTTGAAGTCGCCA
AtLEA	GATTGACCCGGCTGAGCTACGA
	AGATGGGATTCACCACAAAAGA
AtP5CS	GGGACAAGTTGTGGATGGAGAC
	TGGTACAAACCTCAAGGAACAC
AtNHX1	AGCCTTCAGGGAACCACAAT
	CTCCAAAGACGGGTCGCATG
AtUBQ	AGTCCACCCTTCATCTTGTTCTC
	GTCAGCCAAAGTTCTTCCATCT
